# Supplementary material for: Action and Entropy in Heat Engines: An Action Revision of the Carnot Cycle
Source: MDPI journal article supplement (doi:10.3390/e23070860), 2021-07-05
Supplement: s1 [file s1]

CARNOT6 Carnot Cycle Ar,N2,H2O

Corrected 04 Apr 2021

Inputs Y,F,R,P,H,L,M,N,A,B,C,Q

Input rotational symmetry

0160 096 LABEL

0161 089 Y

0162 107 STO MEM

0163 056 8

0164 057 9

0165 119 print

0166 002 HALT

0167 048 0

Source temperature degrees Kelvin Ts

0208 096 LABEL

0209 070 F

0210 107 STO MEM

0211 048 0

0212 049 1

0213 119 print

0214 002 HALT

0215 048 0

Temperature of refrigerator Tr

0256 096 LABEL

0257 082 R

0258 107 STO MEM

0259 048 0

0260 050 2

0261 119 print

0262 002 HALT

0263 048 0

Pressure in atm

0304 096 LABEL

0305 080 P

0306 107 STO MEM

0307 048 0

0308 051 3

0309 119 print

0310 002 HALT

0311 048 0

Stow heat capacity Cv/R

0352 096 LABEL

0353 072 H

0354 107 STO MEM

0355 048 0

0356 052 4

0357 119 print

0358 002 HALT

0359 048 0

Atom mass H1 polyatomic

0400 096 LABEL

0401 076 L

0402 107 STO MEM

0403 048 0

0404 055 7

0405 119 print

0406 002 HALT

Atom monatomic Ar, or M1 or central M

0447 096 LABEL

0448 077 M

0449 107 STO MEM

0450 048 0

0451 053 5

0452 119 print

0453 002 HALT

0454 048 0

Stow molecular mass 2 N or O

0495 096 LABEL

0496 078 N

0497 107 STO MEM

0498 049 1

0499 053 5

0500 119 print

0501 002 HALT

0502 048 0

Bond length diatomic

0543 096 LABEL

0544 090 Z

0545 107 STO MEM

0546 049 1

0547 054 6

0548 119 print

0549 002 HALT

0550 048 0

Moment 1 polyatomic

0591 096 LABEL

0592 065 A

0593 107 STO MEM

0594 048 0

0595 056 8

0596 119 print

0597 002 HALT

Moment 2 polyatomic

0638 096 LABEL

0639 066 B

0640 107 STO MEM

0641 048 0

0642 057 9

0643 119 print

0644 002 HALT

Stow moment 3 polyatomic

0685 096 LABEL

0686 067 C

0687 107 STO MEM

0688 049 1

0689 048 0

0690 119 print

0691 002 HALT

Input source heat nkT=Qf ergs/molecule

Input n for nkT1

0772 096 LABEL

0773 081 Q

0774 107 STO MEM

0775 048 0

0776 054 6

0777 119 print

0778 002 HALT

Execute <SH>X

0819 096 LABEL

0820 088 X

0821 049 1

```

0822 048 0
0823 046 .
0824 050 2
0825 050 2
0826 057 9
0827 054 6
0828 055 7
0829 050 2
0830 119 print
Stow zt translational correction
0871 107 STO MEM
0872 057 9
0873 057 9
Input Boltzmann's k
0914 049 1
0915 046 .
0916 051 3
0917 056 8
0918 048 0
0919 054 6
0920 050 2
0921 053 5
0922 057 9
0923 101 EE
0924 049 1
0925 054 6
0926 111 +/-
0927 107 STO MEM
0928 057 9
0929 055 7
0930 119 print
0931 049 1
0932 046 .
0933 048 0
0934 053 5
0935 052 4
0936 053 5
0937 057 9
0938 049 1
0939 056 8
0940 053 5
0941 101 EE
0942 050 2
0943 055 7
0944 111 +/-
0945 107 STO MEM
0946 057 9
0947 056 8
0948 119 print
Input mass H atom
0989 049 1
0990 046 .
0991 054 6
0992 055 7
0993 050 2
0994 054 6
0995 049 1
0996 052 4
0997 101 EE
0998 050 2

```

```

0999 052 4
1000 111 +/-
1001 107 STO MEM
1002 057 9
1003 054 6
1004 119 print
Input c speed light
1045 050 2
1046 046 .
1047 057 9
1048 057 9
1049 055 7
1050 057 9
1051 050 2
1052 052 4
1053 053 5
1054 056 8
1055 101 EE
1056 049 1
1057 048 0
1058 107 STO MEM
1059 057 9
1060 053 5
Recall pressure1 and calculate r1
 $r1^3 = (T1p2r2^3)/T2p1$ 
1141 040 (
1142 109 RCL MEM
1143 048 0
1144 049 1
1145 047 /
1146 050 2
1147 057 9
1148 056 8
1149 046 .
1150 049 1
1151 053 5
1152 041 )
1153 047 /
1154 109 RCL MEM
1155 048 0
1156 051 3
1157 061 =
1158 092 Root
1159 051 3
1160 042 x
Input r2 at 1 atm and 298.15K
1201 049 1
1202 046 .
1203 054 6
1204 057 9
1205 057 9
1206 054 6
1207 052 4
1208 101 EE
1209 055 7
1210 111 +/-
1211 041 )
1212 119 print
Store r1 radial separation
1253 107 STO MEM

```



```

1254 057 9
1255 048 0
Go to S
1296 083 S
Subroutine SnTn entropic energy
1337 096 LABEL
1338 068 D
1339 040 (
1340 040 (
1341 109 RCL MEM
1342 048 0
1343 053 5
1344 043 +
1345 109 RCL MEM
1346 049 1
1347 053 5
1348 041 )
1349 042 x
1350 109 RCL MEM
1351 057 9
1352 054 6
1353 042 x
1354 040 (
1355 109 RCL MEM
1356 053 5
1357 048 0
1358 113 Square
1359 041 )
1360 061 =

```

Print In

```

1401 119 print
1402 042 x
1403 051 3
1404 042 x
1405 109 RCL MEM
1406 057 9
1407 055 7
1408 042 x

```

Recall temperature r51

```

1449 109 RCL MEM
1450 053 5
1451 049 1
1452 041 )
1453 047 /
1454 109 RCL MEM
1455 057 9
1456 057 9
1457 061 =

```

Print  $3kTnIn=\theta_{tn}^2$  trans action square

```

1498 119 print
1499 092 Root
1500 050 2
1501 061 =

```

Print  $\theta_n$  translational action

```

1542 119 print
1543 047 /
1544 109 RCL MEM
1545 057 9
1546 056 8
1547 061 =

```

Print quantum number

```

1588 119 print
1589 107 STO MEM
1590 054 6
1591 048 0
1592 121 Cube
1593 110 LOG e
1594 042 x
1595 109 RCL MEM
1596 057 9
1597 055 7
1598 061 =

```

Print translational  $-gt/T$

```

1639 119 print
1640 107 STO MEM
1641 055 7
1642 048 0
1643 042 x
1644 109 RCL MEM
1645 053 5
1646 049 1

```

Print  $kTnln[\theta_{nt}/h)^{3/zt}]=-g_{tn}$

```

1687 061 =
1688 119 print
1689 107 STO MEM
1690 055 7
1691 049 1
1692 043 +
1693 040 (
1694 109 RCL MEM
1695 057 9
1696 055 7
1697 042 x
1698 109 RCL MEM
1699 053 5
1700 049 1
1701 041 )
1702 061 =

```

Print  $-a$  Helmholtz energy

```

1743 119 print
1744 107 STO MEM
1745 055 7
1746 054 6
1747 043 +
1748 040 (
1749 109 RCL MEM
1750 048 0
1751 052 4
1752 042 x
1753 109 RCL MEM
1754 057 9
1755 055 7
1756 042 x
1757 109 RCL MEM
1758 053 5
1759 049 1
1760 041 )
1761 061 =
1762 119 print

```

Print  $stnTn$  for any gas

|                                        |     |         |                                                 |     |         |
|----------------------------------------|-----|---------|-------------------------------------------------|-----|---------|
| 1803                                   | 107 | STO MEM | 2136                                            | 049 | 1       |
| 1804                                   | 056 | 8       | 2137                                            | 050 | 2       |
| 1805                                   | 048 | 0       | 2138                                            | 041 | )       |
| 1806                                   | 047 | /       | 2139                                            | 064 | Inverse |
| 1807                                   | 109 | RCL MEM | 2140                                            | 037 | If pos  |
| 1808                                   | 053 | 5       | 2141                                            | 116 | Tangent |
| 1809                                   | 049 | 1       | Calculate Sr for water                          |     |         |
| 1810                                   | 061 | =       | $Sr = R \ln[\pi / 2e^3 / 20a0b0c / h - ^3 / z)$ |     |         |
| Print stn                              |     |         | Calculate @rA                                   |     |         |
| 1851                                   | 119 | print   | 2262                                            | 096 | LABEL   |
| 1852                                   | 107 | STO MEM | 2263                                            | 116 | Tangent |
| 1853                                   | 056 | 8       | 2264                                            | 040 | (       |
| 1854                                   | 049 | 1       | 2265                                            | 109 | RCL MEM |
| 1855                                   | 040 | (       | 2266                                            | 048 | 0       |
| 1856                                   | 109 | RCL MEM | 2267                                            | 056 | 8       |
| 1857                                   | 055 | 7       | 2268                                            | 042 | x       |
| 1858                                   | 049 | 1       | 2269                                            | 109 | RCL MEM |
| 1859                                   | 047 | /       | 2270                                            | 053 | 5       |
| 1860                                   | 109 | RCL MEM | 2271                                            | 049 | 1       |
| 1861                                   | 054 | 6       | 2272                                            | 042 | x       |
| 1862                                   | 048 | 0       | 2273                                            | 050 | 2       |
| 1863                                   | 061 | =       | 2274                                            | 042 | x       |
| Print virtual hv                       |     |         | 2275                                            | 109 | RCL MEM |
| 1904                                   | 119 | print   | 2276                                            | 057 | 9       |
| 1905                                   | 047 | /       | 2277                                            | 055 | 7       |
| 1906                                   | 109 | RCL MEM | 2278                                            | 041 | )       |
| 1907                                   | 057 | 9       | 2279                                            | 064 | Inverse |
| 1908                                   | 056 | 8       | 2280                                            | 113 | Square  |
| 1909                                   | 047 | /       | 2281                                            | 061 | =       |
| 1910                                   | 050 | 2       | Print, stow @rA in r17                          |     |         |
| 1911                                   | 047 | /       | 2322                                            | 119 | print   |
| 1912                                   | 112 | pi      | 2323                                            | 107 | STO MEM |
| 1913                                   | 061 | =       | 2324                                            | 049 | 1       |
| Print virtual translational freq v     |     |         | 2325                                            | 055 | 7       |
| 1954                                   | 119 | print   | 2326                                            | 109 | RCL MEM |
| 1955                                   | 114 | 1/x     | 2327                                            | 049 | 1       |
| 1956                                   | 042 | x       | 2328                                            | 055 | 7       |
| 1957                                   | 109 | RCL MEM | 2329                                            | 047 | /       |
| 1958                                   | 057 | 9       | Recall h-                                       |     |         |
| 1959                                   | 053 | 5       | 2370                                            | 109 | RCL MEM |
| 1960                                   | 061 | =       | 2371                                            | 057 | 9       |
| 1961                                   | 119 | print   | 2372                                            | 056 | 8       |
| Print wavelength virtual trans. quanta |     |         | 2373                                            | 061 | =       |
| Test if diatomic                       |     |         | Print, stow @rA/h- in r17                       |     |         |
| 2042                                   | 109 | RCL MEM | 2414                                            | 119 | print   |
| 2043                                   | 049 | 1       | 2415                                            | 107 | STO MEM |
| 2044                                   | 053 | 5       | 2416                                            | 049 | 1       |
| 2045                                   | 038 | If zero | 2417                                            | 055 | 7       |
| 2046                                   | 084 | T       | Calculate @rB                                   |     |         |
| Test if triatomic H2O                  |     |         | 2458                                            | 109 | RCL MEM |
| 2087                                   | 109 | RCL MEM | 2459                                            | 048 | 0       |
| 2088                                   | 048 | 0       | 2460                                            | 057 | 9       |
| 2089                                   | 056 | 8       | 2461                                            | 042 | x       |
| 2090                                   | 038 | If zero | 2462                                            | 109 | RCL MEM |
| 2091                                   | 069 | E       | 2463                                            | 053 | 5       |
| Test if non-linear                     |     |         | 2464                                            | 049 | 1       |
| 2132                                   | 040 | (       | 2465                                            | 042 | x       |
| 2133                                   | 048 | 0       | 2466                                            | 050 | 2       |
| 2134                                   | 045 | -       | Recall k                                        |     |         |
| 2135                                   | 109 | RCL MEM | 2507                                            | 042 | x       |



```

2508 109 RCL MEM
2509 057 9
2510 055 7
2511 041 )
2512 092 Root
2513 050 2
2514 061 =
Print, stow @rB in r18
2555 119 print
2556 107 STO MEM
2557 049 1
2558 056 8
2559 109 RCL MEM
2560 049 1
2561 056 8
2562 047 /
Recall h-
2603 109 RCL MEM
2604 057 9
2605 056 8
2606 061 =
Print, stow @rB/h- in r18
2647 119 print
2648 107 STO MEM
2649 049 1
2650 056 8
2651 061 =
Calculate @rC
2692 040 (
2693 109 RCL MEM
2694 049 1
2695 048 0
2696 042 x
2697 109 RCL MEM
2698 053 5
2699 049 1
2700 042 x
2701 050 2
2702 042 x
Recall k
2743 109 RCL MEM
2744 057 9
2745 055 7
2746 041 )
2747 092 Root
2748 050 2
2749 061 =
Print, stow @rC in r19
2790 119 print
2791 107 STO MEM
2792 049 1
2793 057 9
2794 109 RCL MEM
2795 049 1
2796 057 9
2797 047 /
Recall h-
2838 109 RCL MEM
2839 057 9
2840 056 8

```

```

2841 061 =
Print, stow @rC/h-
2882 119 print
2883 107 STO MEM
2884 049 1
2885 057 9
jrxjrxjr
2926 040 (
2927 040 (
2928 109 RCL MEM
2929 049 1
2930 055 7
2931 042 x
2932 109 RCL MEM
2933 049 1
2934 056 8
2935 042 x
2936 109 RCL MEM
2937 049 1
2938 057 9
2939 041 )
Print jrA x jrB x jrC
2980 119 print
Recall symmetry factor
3021 042 x
3022 040 (
3023 112 pi
3024 064 Inverse
3025 113 Square
3026 041 )
3027 041 )
Print corrected jrcubed
3068 119 print
3069 107 STO MEM
3070 054 6
3071 049 1
3072 109 RCL MEM
3073 054 6
3074 049 1
3075 047 /
3076 109 RCL MEM
3077 056 8
3078 057 9
3079 110 LOG e
3080 042 x
Recall k
3121 109 RCL MEM
3122 057 9
3123 055 7
3124 061 =
Print, stow -gr/T in r72
3165 119 print
3166 107 STO MEM
3167 055 7
3168 050 2
3169 119 print
3170 042 x
3171 109 RCL MEM
3172 053 5
3173 049 1

```

|                        |     |         |                                     |     |         |
|------------------------|-----|---------|-------------------------------------|-----|---------|
| 3174                   | 061 | =       | 3429                                | 041 | )       |
| Print -gr              |     |         | 3430                                | 061 | =       |
| 3215                   | 119 | print   | Print virtual hvr                   |     |         |
| 3216                   | 107 | STO MEM | 3471                                | 119 | print   |
| 3217                   | 055 | 7       | 3472                                | 047 | /       |
| 3218                   | 051 | 3       | 3473                                | 109 | RCL MEM |
| 3219                   | 040 | (       | 3474                                | 057 | 9       |
| 3220                   | 109 | RCL MEM | 3475                                | 056 | 8       |
| 3221                   | 055 | 7       | 3476                                | 047 | /       |
| 3222                   | 049 | 1       | 3477                                | 050 | 2       |
| 3223                   | 043 | +       | 3478                                | 047 | /       |
| 3224                   | 109 | RCL MEM | 3479                                | 112 | pi      |
| 3225                   | 055 | 7       | 3480                                | 061 | =       |
| 3226                   | 051 | 3       | Print vr                            |     |         |
| 3227                   | 041 | )       | 3521                                | 119 | print   |
| 3228                   | 061 | =       | 3522                                | 114 | 1/x     |
| Print -gt -gr          |     |         | 3523                                | 042 | x       |
| 3269                   | 119 | print   | 3524                                | 109 | RCL MEM |
| 3270                   | 107 | STO MEM | 3525                                | 057 | 9       |
| 3271                   | 055 | 7       | 3526                                | 053 | 5       |
| 3272                   | 052 | 4       | 3527                                | 061 | =       |
| 3273                   | 047 | /       | Print virtual rotational wavelength |     |         |
| 3274                   | 109 | RCL MEM | 3568                                | 119 | print   |
| 3275                   | 053 | 5       | 3569                                | 063 | Goto    |
| 3276                   | 049 | 1       | 3570                                | 084 | T       |
| 3277                   | 061 | =       | Calculate rotational quantum no.    |     |         |
| Print -grn/Tn - gtn/Tn |     |         | 3611                                | 096 | LABEL   |
| 3318                   | 119 | print   | 3612                                | 069 | E       |
| 3319                   | 107 | STO MEM | 3613                                | 109 | RCL MEM |
| 3320                   | 055 | 7       | 3614                                | 048 | 0       |
| 3321                   | 053 | 5       | 3615                                | 053 | 5       |
| 3322                   | 040 | (       | 3616                                | 042 | x       |
| 3323                   | 109 | RCL MEM | 3617                                | 109 | RCL MEM |
| 3324                   | 056 | 8       | 3618                                | 049 | 1       |
| 3325                   | 048 | 0       | 3619                                | 053 | 5       |
| 3326                   | 043 | +       | 3620                                | 041 | )       |
| 3327                   | 109 | RCL MEM | 3621                                | 047 | /       |
| 3328                   | 055 | 7       | 3622                                | 040 | (       |
| 3329                   | 051 | 3       | 3623                                | 109 | RCL MEM |
| 3330                   | 041 | )       | 3624                                | 048 | 0       |
| Print total snTn       |     |         | 3625                                | 053 | 5       |
| 3371                   | 119 | print   | 3626                                | 043 | +       |
| 3372                   | 107 | STO MEM | 3627                                | 109 | RCL MEM |
| 3373                   | 056 | 8       | 3628                                | 049 | 1       |
| 3374                   | 050 | 2       | 3629                                | 053 | 5       |
| 3375                   | 047 | /       | 3630                                | 041 | )       |
| 3376                   | 109 | RCL MEM | 3631                                | 042 | x       |
| 3377                   | 053 | 5       | Recall H atom mass                  |     |         |
| 3378                   | 049 | 1       | 3672                                | 109 | RCL MEM |
| 3379                   | 061 | =       | 3673                                | 057 | 9       |
| Print stn + Srn        |     |         | 3674                                | 054 | 6       |
| 3420                   | 119 | print   | 3675                                | 042 | x       |
| 3421                   | 040 | (       | 3676                                | 040 | (       |
| 3422                   | 109 | RCL MEM | 3677                                | 109 | RCL MEM |
| 3423                   | 055 | 7       | 3678                                | 049 | 1       |
| 3424                   | 051 | 3       | 3679                                | 054 | 6       |
| 3425                   | 047 | /       | 3680                                | 113 | Square  |
| 3426                   | 109 | RCL MEM | 3681                                | 041 | )       |
| 3427                   | 054 | 6       | 3682                                | 061 | =       |
| 3428                   | 049 | 1       | Print Ir                            |     |         |



```

3723 119 print
3724 042 x
3725 040 (
3726 050 2
3727 042 x
3728 109 RCL MEM
3729 057 9
3730 055 7
3731 042 x
3732 109 RCL MEM
3733 053 5
3734 049 1
3735 041 )
3736 061 =
3737 047 /
3738 109 RCL MEM
3739 056 8
3740 057 9
3741 061 =
Print @r^2
3782 119 print
3783 064 Inverse
3784 113 Square
3785 061 =
Print @r rotational action
3826 119 print
3827 047 /
3828 109 RCL MEM
3829 057 9
3830 056 8
3831 061 =
Print jr
3872 119 print
3873 107 STO MEM
3874 054 6
3875 049 1
3876 109 RCL MEM
3877 054 6
3878 049 1
3879 110 LOG e
3880 042 x
3881 109 RCL MEM
3882 057 9
3883 055 7
3884 042 x
3885 050 2
3886 061 =
Print rotational -gr/T
3927 107 STO MEM
3928 055 7
3929 050 2
3930 119 print
3931 042 x
3932 109 RCL MEM
3933 053 5
3934 049 1
3935 061 =
Print -gr
3976 119 print
3977 107 STO MEM

```

```

3978 055 7
3979 051 3
3980 040 (
3981 109 RCL MEM
3982 055 7
3983 049 1
3984 043 +
3985 109 RCL MEM
3986 055 7
3987 051 3
3988 041 )
3989 061 =
Print total -gt - gr
4030 119 print
4031 107 STO MEM
4032 055 7
4033 052 4
4034 047 /
4035 109 RCL MEM
4036 053 5
4037 049 1
4038 061 =
Print -grn/Tn - gtn/Tn
4079 119 print
4080 107 STO MEM
4081 055 7
4082 053 5
4083 040 (
4084 109 RCL MEM
4085 056 8
4086 048 0
4087 043 +
4088 109 RCL MEM
4089 055 7
4090 051 3
4091 041 )
Print Total snTn
4132 107 STO MEM
4133 056 8
4134 050 2
4135 119 print
4136 047 /
4137 109 RCL MEM
4138 053 5
4139 049 1
4140 061 =
Print stn+srn
4181 119 print
4182 040 (
4183 109 RCL MEM
4184 055 7
4185 051 3
4186 047 /
4187 109 RCL MEM
4188 054 6
4189 049 1
4190 041 )
4191 061 =
Print virtual hvr
4232 119 print

```

|                                     |     |         |  |                                       |         |                   |
|-------------------------------------|-----|---------|--|---------------------------------------|---------|-------------------|
| 4233                                | 047 | /       |  | 4488                                  | 109     | RCL MEM           |
| 4234                                | 109 | RCL MEM |  | 4489                                  | 054     | 6                 |
| 4235                                | 057 | 9       |  | 4490                                  | 048     | 0                 |
| 4236                                | 056 | 8       |  | 4491                                  | 041     | )                 |
| 4237                                | 047 | /       |  | Print                                 | -at/a^3 | Helmholtz density |
| 4238                                | 050 | 2       |  | 4532                                  | 119     | print             |
| 4239                                | 047 | /       |  | 4533                                  | 040     | (                 |
| 4240                                | 112 | pi      |  | 4534                                  | 109     | RCL MEM           |
| 4241                                | 061 | =       |  | 4535                                  | 057     | 9                 |
| Print vr                            |     |         |  | 4536                                  | 055     | 7                 |
| 4282                                | 119 | print   |  | 4537                                  | 042     | x                 |
| 4283                                | 114 | 1/x     |  | 4538                                  | 109     | RCL MEM           |
| 4284                                | 042 | x       |  | 4539                                  | 053     | 5                 |
| 4285                                | 109 | RCL MEM |  | 4540                                  | 049     | 1                 |
| 4286                                | 057 | 9       |  | 4541                                  | 041     | )                 |
| 4287                                | 053 | 5       |  | 4542                                  | 047     | /                 |
| 4288                                | 061 | =       |  | 4543                                  | 040     | (                 |
| Print virtual rotational wavelength |     |         |  | 4544                                  | 109     | RCL MEM           |
| 4329                                | 119 | print   |  | 4545                                  | 053     | 5                 |
| 4330                                | 096 | LABEL   |  | 4546                                  | 048     | 0                 |
| 4331                                | 084 | T       |  | 4547                                  | 121     | Cube              |
| 4332                                | 109 | RCL MEM |  | 4548                                  | 041     | )                 |
| 4333                                | 053 | 5       |  | 4549                                  | 047     | /                 |
| 4334                                | 048 | 0       |  | 4550                                  | 056     | 8                 |
| 4335                                | 121 | Cube    |  | 4551                                  | 061     | =                 |
| 4336                                | 042 | x       |  | Print pressure pn                     |         |                   |
| 4337                                | 056 | 8       |  | 4592                                  | 119     | print             |
| 4338                                | 061 | =       |  | 4593                                  | 042     | x                 |
| Print vn                            |     |         |  | 4594                                  | 109     | RCL MEM           |
| 4379                                | 119 | print   |  | 4595                                  | 054     | 6                 |
| 4380                                | 107 | STD MEM |  | 4596                                  | 048     | 0                 |
| 4381                                | 054 | 6       |  | 4597                                  | 061     | =                 |
| 4382                                | 048 | 0       |  | Print pnv                             |         |                   |
| 4383                                | 040 | (       |  | 4638                                  | 119     | print             |
| 4384                                | 109 | RCL MEM |  | 4639                                  | 047     | /                 |
| 4385                                | 055 | 7       |  | 4640                                  | 109     | RCL MEM           |
| 4386                                | 049 | 1       |  | 4641                                  | 053     | 5                 |
| 4387                                | 047 | /       |  | 4642                                  | 049     | 1                 |
| 4388                                | 109 | RCL MEM |  | 4643                                  | 061     | =                 |
| 4389                                | 054 | 6       |  | Print pnv/Tn                          |         |                   |
| 4390                                | 048 | 0       |  | 4684                                  | 119     | print             |
| 4391                                | 041 | )       |  | 4685                                  | 060     | Return            |
| Print -gt/a^3 density Gibbs         |     |         |  | Set up V values                       |         |                   |
| 4432                                | 119 | print   |  | 4726                                  | 096     | LABEL             |
| 4433                                | 040 | (       |  | 4727                                  | 083     | S                 |
| 4434                                | 109 | RCL MEM |  | Calculate Q1 source heat per molecule |         |                   |
| 4435                                | 055 | 7       |  | 4768                                  | 040     | (                 |
| 4436                                | 052 | 4       |  | Input n for Qs                        |         |                   |
| 4437                                | 047 | /       |  | 4809                                  | 109     | RCL MEM           |
| 4438                                | 109 | RCL MEM |  | 4810                                  | 048     | 0                 |
| 4439                                | 054 | 6       |  | 4811                                  | 054     | 6                 |
| 4440                                | 048 | 0       |  | 4812                                  | 042     | x                 |
| 4441                                | 041 | )       |  | 4813                                  | 109     | RCL MEM           |
| Print -gt+-gr/a^3 Gibbs density     |     |         |  | 4814                                  | 057     | 9                 |
| 4482                                | 119 | print   |  | 4815                                  | 055     | 7                 |
| 4483                                | 040 | (       |  | 4816                                  | 042     | x                 |
| 4484                                | 109 | RCL MEM |  | 4817                                  | 109     | RCL MEM           |
| 4485                                | 055 | 7       |  | 4818                                  | 048     | 0                 |
| 4486                                | 054 | 6       |  | 4819                                  | 049     | 1                 |
| 4487                                | 047 | /       |  | 4820                                  | 041     | )                 |



|                               |     |          |                          |     |         |
|-------------------------------|-----|----------|--------------------------|-----|---------|
| Print Qf                      |     |          | 5154                     | 107 | STO MEM |
| 4861                          | 119 | print    | 5155                     | 053 | 5       |
| 4862                          | 047 | /        | 5156                     | 048 | 0       |
| 4863                          | 109 | RCL MEM  | Go to Label D and return |     |         |
| 4864                          | 048 | 0        | 5197                     | 068 | D       |
| 4865                          | 049 | 1        | 5198                     | 109 | RCL MEM |
| 4866                          | 061 | =        | 5199                     | 053 | 5       |
| Print ds/molecule=kln(V2/V1)  |     |          | 5200                     | 051 | 3       |
| 4907                          | 119 | print    | 5201                     | 064 | Inverse |
| 4908                          | 047 | /        | 5202                     | 121 | Cube    |
| 4909                          | 109 | RCL MEM  | 5203                     | 042 | x       |
| 4910                          | 057 | 9        | 5204                     | 109 | RCL MEM |
| 4911                          | 055 | 7        | 5205                     | 057 | 9       |
| 4912                          | 061 | =        | 5206                     | 048 | 0       |
| 4913                          | 064 | Inverse  | 5207                     | 061 | =       |
| 4914                          | 110 | LOG e    | Print r2                 |     |         |
| 4915                          | 061 | =        | 5248                     | 119 | print   |
| Print V2/V1 = V3/V4           |     |          | 5249                     | 107 | STO MEM |
| 4956                          | 119 | print    | 5250                     | 053 | 5       |
| 4957                          | 107 | STO MEM  | 5251                     | 048 | 0       |
| 4958                          | 053 | 5        | 5252                     | 068 | D       |
| 4959                          | 051 | 3        | 5253                     | 109 | RCL MEM |
| Calculate V2/V3=(Tr/Ts)^Cv/nR |     |          | 5254                     | 053 | 5       |
| 5000                          | 040 | (        | 5255                     | 052 | 4       |
| 5001                          | 109 | RCL MEM  | 5256                     | 064 | Inverse |
| 5002                          | 048 | 0        | 5257                     | 121 | Cube    |
| 5003                          | 050 | 2        | 5258                     | 042 | x       |
| 5004                          | 047 | /        | 5259                     | 109 | RCL MEM |
| 5005                          | 109 | RCL MEM  | 5260                     | 057 | 9       |
| 5006                          | 048 | 0        | 5261                     | 048 | 0       |
| 5007                          | 049 | 1        | 5262                     | 061 | =       |
| 5008                          | 041 | )        | Print r3                 |     |         |
| 5009                          | 091 | Exponent | 5303                     | 119 | print   |
| 5010                          | 109 | RCL MEM  | 5304                     | 107 | STO MEM |
| 5011                          | 048 | 0        | 5305                     | 053 | 5       |
| 5012                          | 052 | 4        | 5306                     | 048 | 0       |
| 5013                          | 061 | =        | 5307                     | 109 | RCL MEM |
| Print V2/V3                   |     |          | 5308                     | 048 | 0       |
| 5054                          | 119 | print    | 5309                     | 050 | 2       |
| 5055                          | 114 | 1/x      | 5310                     | 107 | STO MEM |
| 5056                          | 042 | x        | 5311                     | 053 | 5       |
| 5057                          | 109 | RCL MEM  | 5312                     | 049 | 1       |
| 5058                          | 053 | 5        | 5313                     | 068 | D       |
| 5059                          | 051 | 3        | 5314                     | 109 | RCL MEM |
| 5060                          | 061 | =        | 5315                     | 053 | 5       |
| Print V3/V1                   |     |          | 5316                     | 048 | 0       |
| 5101                          | 119 | print    | 5317                     | 121 | Cube    |
| 5102                          | 107 | STO MEM  | 5318                     | 042 | x       |
| 5103                          | 053 | 5        | 5319                     | 040 | (       |
| 5104                          | 052 | 4        | 5320                     | 109 | RCL MEM |
| Calculate S1T1                |     |          | 5321                     | 053 | 5       |
| 5145                          | 109 | RCL MEM  | 5322                     | 051 | 3       |
| 5146                          | 048 | 0        | 5323                     | 114 | 1/x     |
| 5147                          | 049 | 1        | 5324                     | 041 | )       |
| 5148                          | 107 | STO MEM  | 5325                     | 061 | =       |
| 5149                          | 053 | 5        | 5326                     | 064 | Inverse |
| 5150                          | 049 | 1        | 5327                     | 121 | Cube    |
| 5151                          | 109 | RCL MEM  | 5328                     | 061 | =       |
| 5152                          | 057 | 9        | Print r4                 |     |         |
| 5153                          | 048 | 0        | 5369                     | 119 | print   |
